# Supplementary material for: Noninjection ultralarge-scaled synthesis of shape-tunable CdS nanocrystals as photocatalysts
Source: Royal Society of Chemistry journal article supplement (doi:10.1039/c3ra41805g), 2013-01-01
Supplement: c3ra41805g.pdf [file c3ra41805g.pdf]

## Supporting Information

### Noninjection Ultralarge-Scaled Synthesis of Shape-Tunable CdS

#### Nanocrystals as Photocatalysts

Wenjin Zhang, Hua Zhang\* and Xinhua Zhong

*Shanghai Key Laboratory of Functional Materials Chemistry, Institute of Applied Chemistry,  
East China University of Science and Technology, Shanghai 200237, China.*

*E-mail: [zhanghjy@ecust.edu.cn](mailto:zhanghjy@ecust.edu.cn); Fax: +86 21 6425 0281; Tel: +86 21 6425 0281*

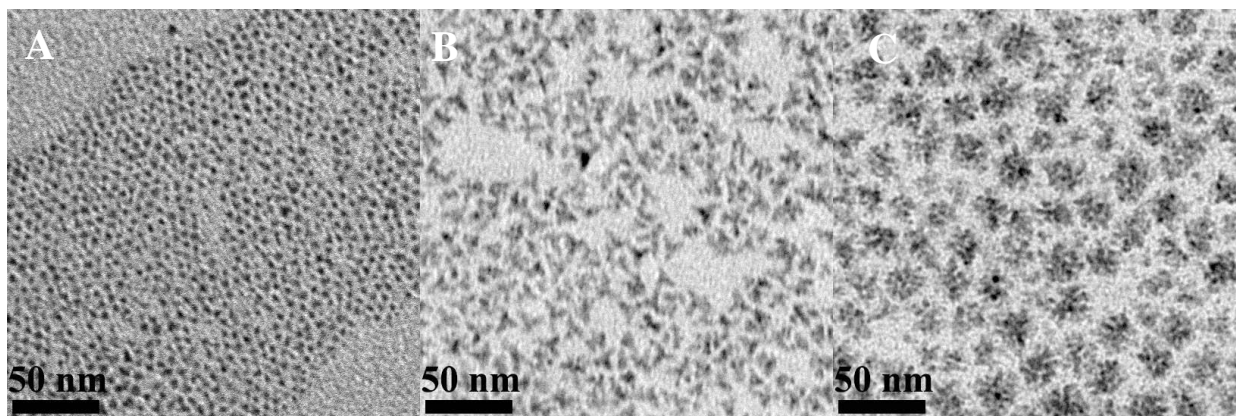

**Fig. S1** TEM images of CdS NCs with spheres (A), branches (B) and flowers (C) after the reaction was scaled up.

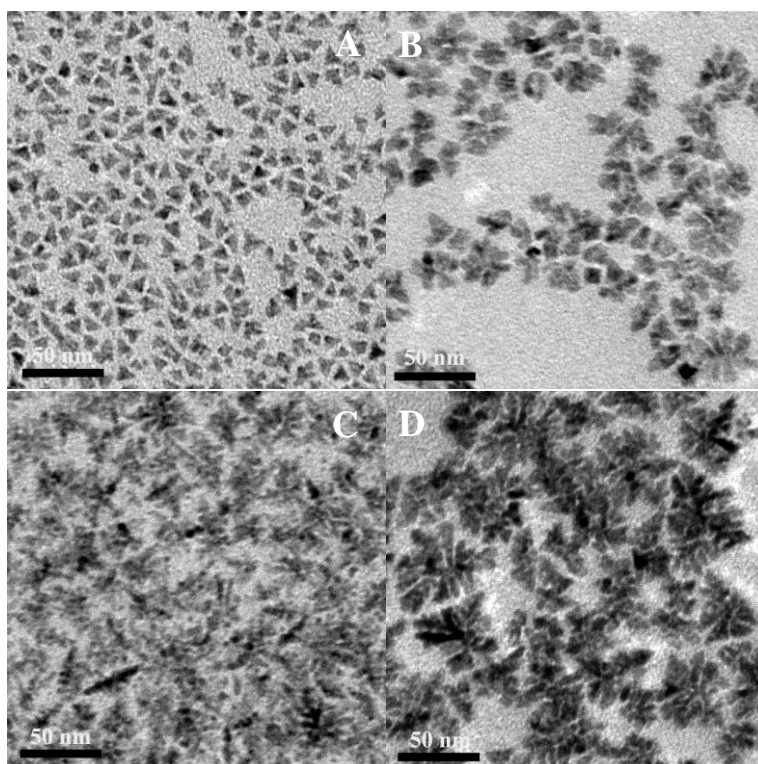

**Fig. S2** TEM images of CdS NCs obtained under different amounts of OA: 3.0 mL (A), 5.0 mL (B), 10.0 mL (C), and 20.0 mL (D).

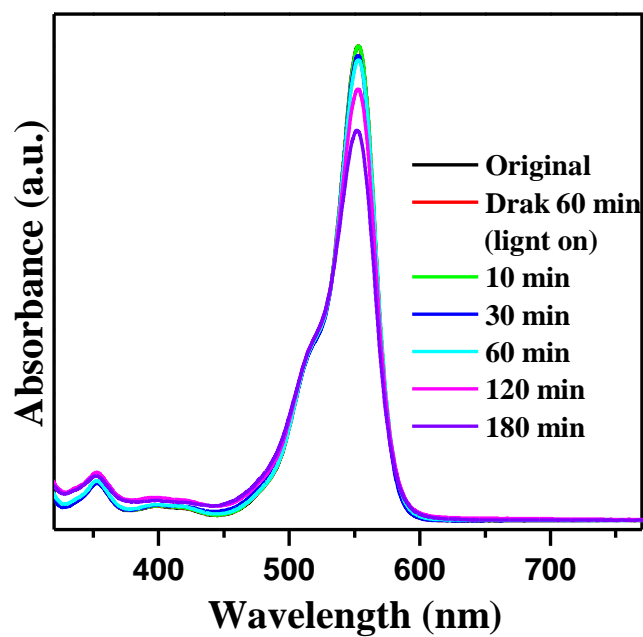

**Fig. S3** Temporal evolution of the absorption spectra of RhB aqueous solution without the presence of CdS NCs under UV light irradiation.

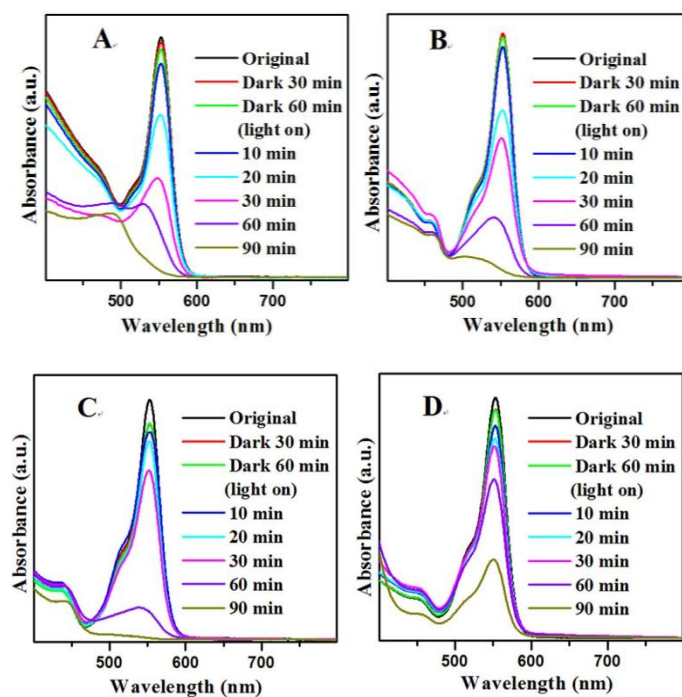

**Fig. S4** Temporal evolution of the absorption spectra of RhB in the presence of CdS NCs with different shapes of (A) Tetrahedrons (B) Branches (C) Flowers (D) Spheres.
